## Wise, a context-dependent activator and inhibitor of Wnt signalling

Nobue Itasaki<sup>1,\*</sup>, C. Michael Jones<sup>2,†</sup>, Sara Mercurio<sup>1,2</sup>, Alison Rowe<sup>1</sup>, Pedro M. Domingos<sup>1,‡</sup>, James C. Smith<sup>2,§</sup> and Robb Krumlauf<sup>1,\*</sup>

<sup>1</sup>Division of Developmental Neurobiology, National Institute for Medical Research, The Ridgeway, Mill Hill, London NW7 1AA, UK

<sup>2</sup>Division of Developmental Biology, National Institute for Medical Research, The Ridgeway, Mill Hill, London NW7 1AA, UK

\*Authors for correspondence (e-mail: nitasak@nimr.mrc.ac.uk and rek@stowers-institute.org)

†Present address: Section of Gene Function and Regulation, Chester Beatty Laboratories, Institute of Cancer Research, 237 Fulham Road, London SW3 6JB, UK

‡Present address: Box 252, The Rockefeller University, 1230 York Avenue, New York, NY 10021, USA

§Present address: Wellcome Trust/Cancer Research UK Institute and Department of Zoology, University of Cambridge, Tennis Court Road, Cambridge CB2 1QR, UK

¶Present address: Stowers Institute for Medical Research, 1000 East 50th Street, Kansas City, MO 64110, USA

Accepted 3 June 2003

### SUMMARY

We have isolated a novel secreted molecule, *Wise*, by a functional screen for activities that alter the anteroposterior character of neuralised *Xenopus* animal caps. *Wise* encodes a secreted protein capable of inducing posterior neural markers at a distance. Phenotypes arising from ectopic expression or depletion of *Wise* resemble those obtained when Wnt signalling is altered. In animal cap assays, posterior neural markers can be induced by Wnt family members, and induction of these markers by *Wise* requires components of the canonical Wnt pathway. This indicates that in this context *Wise* activates the Wnt signalling cascade by mimicking some of the effects of Wnt ligands. Activation of the pathway was further confirmed

by nuclear accumulation of  $\beta$ -catenin driven by *Wise*. By contrast, in an assay for secondary axis induction, extracellularly *Wise* antagonises the axis-inducing ability of Wnt8. Thus, *Wise* can activate or inhibit Wnt signalling in a context-dependent manner. The *Wise* protein physically interacts with the Wnt co-receptor, lipoprotein receptor-related protein 6 (LRP6), and is able to compete with Wnt8 for binding to LRP6. These activities of *Wise* provide a new mechanism for integrating inputs through the Wnt co-receptor complex to modulate the balance of Wnt signalling.

Key words: *Wise*, Wnt signalling, *Xenopus*

### INTRODUCTION

Signalling molecules play key roles in developmental events and their actions are highly regulated by endogenous modulators and antagonists in order to obtain precisely balanced outputs. The process of neural anteroposterior (AP) patterning involves integration of various signals such as retinoic acid (RA), fibroblast growth factors (FGFs) and members of the Wnt family. However, the relative roles of these cascades, the degree to which they are used at any particular axial level, and how they are integrated in organising normal AP patterning is poorly understood. Identification of factors that can modulate existing pathways or that represent novel signalling inputs will be beneficial to our understanding of how AP patterning is coordinated.

Analysis of neural patterning is complicated by the tissue interactions and dynamic morphogenetic movements that occur during gastrulation. *Xenopus* animal caps provide a simplified system for studying patterning events separate from morphogenetic movements. Animal caps alone form epidermis in culture, but when treated with antagonists of BMP signalling they can be induced to adopt an anterior neural fate (Hemmati-Brivanlou and Melton, 1997). This anterior neural tissue is capable of altering its positional identity to a more posterior character under the influence of signals from tissues surrounding the neural tube or by ectopic application of posteriorising factors, such as RA, FGF and Wnt family

members (Baker et al., 1999; Blumberg et al., 1997; Domingos et al., 2001; Itoh and Sokol, 1997; Kolm et al., 1997; Lamb and Harland, 1995; McGrew et al., 1997; McGrew et al., 1995; Pownall et al., 1996).

Experiments in *Xenopus* have shown that planar signals within the neuroectoderm and vertical signals from the underlying mesoderm work in concert to control regional identity of the nervous system (Doniach, 1993). Although early AP specification of the nervous system occurs during gastrulation, the neural cells are not irreversibly committed to a particular identity. Grafting experiments in several species have revealed that plasticity in regional character is retained after gastrulation (Cox and Hemmati-Brivanlou, 1995; Gould et al., 1998; Grapin-Botton et al., 1997; Itasaki et al., 1996; Muhr et al., 1997; Trainor and Krumlauf, 2000; Woo and Fraser, 1997), suggesting that neural cells are actively receiving signals and communicating with surrounding tissues at later stages.

In this study, we performed a functional screen to search for novel factors derived from tissues surrounding the neural tube with the potential to alter the AP character of neuralised *Xenopus* animal caps. We have identified a novel gene, *Wise*, expressed in the surface ectoderm. *Wise* encodes a secreted protein that is capable of inducing posterior neural markers, and modulates the Wnt signalling pathway in a context-dependent manner. Our results provide a novel mechanism for

modulating the Wnt pathway and support a role for Wnt signalling in the neural patterning process.

## MATERIALS AND METHODS

### Library screening and embryo analysis

A cDNA library was made from stage 8-13 (Hamburger and Hamilton, 1951) chick embryos using tissues surrounding the neural tube (Fig. 1A) from axial levels capable of inducing *Hoxb4* expression in grafting experiments (Itasaki et al., 1996). Size-selected (>1 kb) cDNAs were directionally inserted into a modified 64T vector (Tada et al., 1998). The library contained 250,000 unamplified clones, and 50,000 of these were divided into 100 pools (500 clones per pool). For initial screening, 10 pools were mixed to prepare a single large DNA pool (5000 clones) used to synthesise capped RNA. *Xenopus* eggs were fertilised, cultured and injected as previously described (Jones and Smith, 1999). Animal caps were cut at stage 8, and incubated until siblings reached stage 25. Explants were collected and analysed for specific markers using RT-PCR (Hemmati-Brivanlou and Melton, 1994). For explant recombination assays, separate sets of embryos were injected with either *noggin* and FIDx (Molecular Probes) or *Wise* and *lacZ* RNA. FIDx and *lacZ* were used as lineage tracers. Caps were cut at stage 8, combined and cultured for assay at stage 25. To detect subcellular localisation of endogenous  $\beta$ -catenin, relevant RNAs were injected into the animal half of *Xenopus* embryos at the eight-cell stage. Animal caps were cut at stage 7 and fixed 10-15 minutes later when the cap edge was healed. Cryosections (16  $\mu$ m) were then stained with an anti- $\beta$ -catenin antibody (Sigma) and a secondary antibody conjugated with HRP.

### *Xenopus* homologues of Wise

*Xenopus Wise* was isolated from stage 25 embryos by RT-PCR. The degenerate primers used were: upstream, 5'-GCTTT(C/T)AA(A/G)AA(C/T)GATGCCAC-3'; downstream, 5'-GTGAC(T/C)AC(T/G/A)GT(T/G)ATTTTGTA-3'. Two different clones were identified, presumably resulting from the pseudotetraploid *Xenopus* genome. For each clone, a longer version covering the start codon was isolated from a *Xenopus* stage 35 cDNA library.

### DNA constructs

The dominant-negative Dishevelled construct DIX, specific to the canonical Wnt pathway (Axelrod et al., 1998) was made by creating a stop codon after amino acid 170 (Glutamine) by PCR and subcloned into pCS2+. Tagged *Wise* constructs were generated by PCR, and their activity was confirmed by injection into *Xenopus* embryos with *noggin* and assayed for induction of *en2* in animal caps.  $\Delta$ E1-2 IgG (lacking EGF repeat 1 and 2) and  $\Delta$ E3-4 IgG (lacking EGF repeat 3 and 4) of human LRP6 were generated by fusing the extracellular domains E3-4 and E1-2 of LRP6 (Mao et al., 2001) to the IgG Fc domain (Tamai et al., 2000). A FLAG tag was attached to chick Frizzled 1 extracellular domain (amino acids 1-199) by PCR. Other constructs were as previously published.

### RNA and morpholino injection

The relevant amounts of RNA injected per embryo were as follows. Initial screening: *noggin* (500 pg) and RNA from pools (12 ng). Fig. 1B: *noggin* (500 pg) and *Wise* (150, 300, 600, 1200 pg). Fig. 1C: *Wise* (30 ng). Fig. 1D,E: *noggin* (500 pg), *Wise* (600 pg) and *lacZ* (100 pg). Fig. 3: *Wise* (300-500 pg) and *lacZ* (50 pg); *Wise* morpholino (30 ng). Fig. 4A: *Wise* (chick, *Xenopus*) (500 pg). Fig. 4B-K: control or *Wise* morpholino (33 ng). Fig. 5A: *noggin* (500 pg), *Wise* (600 pg);  $\Delta$ *Wnt8* (200 pg),  $\Delta$ *LRP6* (1 ng);  $\Delta$ *Dsh*(*ddl*) (1.2 ng), *GSK3* (500 pg) and *LEFAN* (200 pg). Fig. 5B: *noggin* (500 pg), *Wnt8* (50 pg), *Wise* (600 pg) and  $\Delta$ *Fz8* (2 ng). Fig. 5C: *noggin* (500 pg), *Wnt8* (600 pg), *Wise* (800 pg),  $\Delta$ *Wnt8* (800 pg). Fig. 5E-G: *Tcf3* (300 pg), *Wnt8* (25 pg),

*Wise* (300 pg). Fig. 6A-C: *Wnt8* (5 pg), *Wise* (200 pg) and  $\Delta$ *Dsh* (*DIX*) (1 ng). Fig. 6D: *Wise* (1 ng), *Wnt8* (100 pg), *Dsh* (1 ng) and  $\beta$ -*catenin* (200 pg). Fig. 6E,F: *tBR* (900 pg) and *Wise* (50 pg). Fig. 7C: *Wise* (1 ng). Fig. 7D: *Wise* (0.5 ng, 1 ng).

Morpholino antisense oligonucleotides were designed against the beginning of the coding region of the two *Xenopus Wise* genes. The sequences were: 5'-AGCACTGGAGCCTTGAGACAACCAT-3'; 5'-AGCAGTGAAGCCTTGAGACAACCAT-3'. A 1:1 mixture of these oligonucleotides were diluted in PIPES (5 mM) buffered water and used for injection. The control morpholino was; 5'-CCTCTTACCTCAGTTACAATTTATA-3', which is a generic control from the supplier (Gene Tools), designed against human  $\beta$ -globin. 30-60 ng of morpholino were injected into whole embryos, and 13-60 ng were injected into a dorsal-animal or ventral-animal blastomere to target the surface ectoderm.

### Protein analysis

To test the secretion of *Wise* protein, 15 oocytes were injected with RNA encoding HA-tagged *Wise* and incubated in a 96-well dish with 150  $\mu$ l of OR2 medium (Wallace et al., 1973) + 0.01% BSA for 2 days. Oocytes and the conditioned medium were collected separately and used for western blotting with an anti-HA antibody (Roche).

For immunoprecipitation of conditioned medium, 293 cells were transfected with DNA and the conditioned medium (opti-MEM, Gibco) was concentrated 20- to 40-fold by ultrafiltration. *Wnt8*-myc medium was collected from S2 cells as described (Hsieh et al., 1999). The medium was mixed and incubated overnight at 4°C. Immunoprecipitation was performed using protein A beads (Amersham) and wash-buffer 150 mM NaCl, 50 mM Tris-HCl (pH 7.5) and 0.1% Triton X-100 as previously described (Hsieh et al., 1999; Tamai et al., 2000).

## RESULTS

### Isolation of $\beta$ -catenin and Wise

The functional screen is based on the ability of *noggin* to induce neural tissue in *Xenopus* animal caps with an anterior character that in the presence of other factors can be converted to a more posterior character (Lamb and Harland, 1995; Smith and Harland, 1992). As a source of putative factors, we prepared a cDNA library from dissected tissue (somites, surface ectoderm and endoderm) from stages 8 to 13 (Hamburger and Hamilton, 1951) chick embryos (Fig. 1A), which is known to alter AP character when grafted to an ectopic location (Itasaki et al., 1996). After co-injection of *noggin* RNA with pools of RNA from the library, the induction of posterior character was monitored by RT-PCR on animal caps (Fig. 1A) by assaying for expression of *en2*, *Krox20* and *Hoxb9*, which mark the midbrain, hindbrain and spinal cord, respectively. Myosin was used as a marker for mesoderm induction to allow us to focus on pools that influence neural patterning in the absence of mesoderm. Successive rounds of subdivision and sib selection identified two clones with this inducing activity. One encoded a 5'-truncated version of  $\beta$ -catenin, consistent with data that the canonical Wnt pathway induces posterior neural markers (Domingos et al., 2001; McGrew et al., 1995). The second clone encoded a novel protein, which we have designated *Wise* (Wnt modulator in surface ectoderm) based on this study. Injection of *noggin* with increasing amounts of *Wise* induced progressively more posterior markers (*en2* and *Krox20*) in the absence of mesoderm (myosin) (Fig. 1B). *Wise* alone exhibited no neural- or mesoderm-inducing activity, as confirmed using NCAM, *myosin* (Fig. 1B), *brachyury*, *wnt8* and *Xhox3* (data not

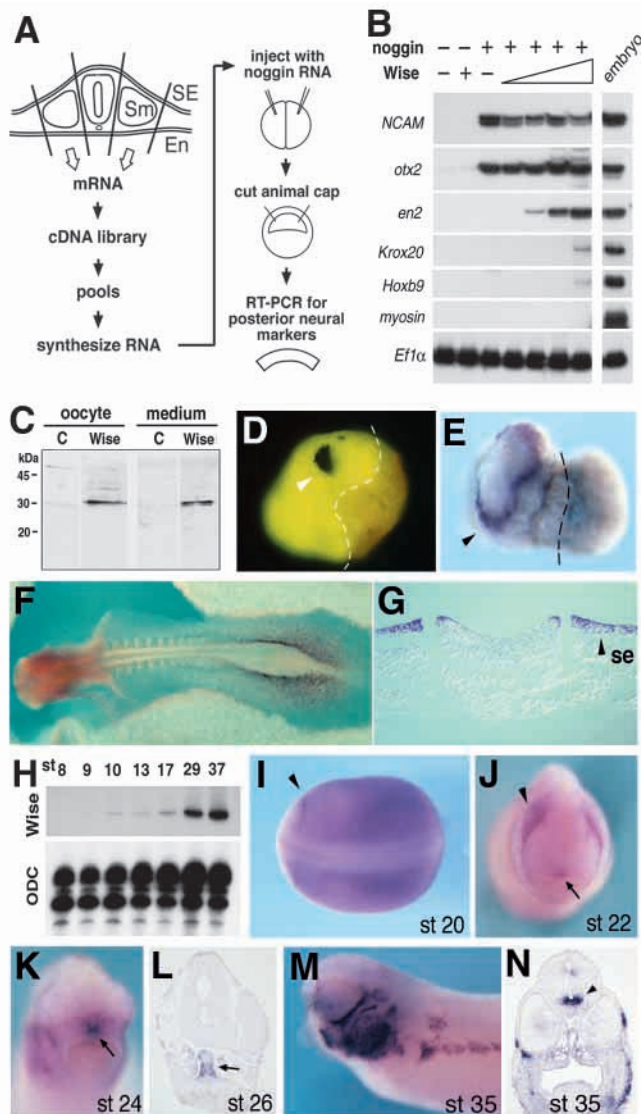

**Fig. 1.** Isolation, characterisation and expression of Wise.

(A) Outline of the screen. (B) RT-PCR analysis using *Wise* RNA. *Wise* alone (600 pg) does not induce pan-neural (*NCAM*) or mesodermal (*myosin*) markers. In the presence of noggin, increasing amounts of *Wise* RNA (150, 300, 600 and 1200 pg) induce progressively more posterior neural markers (*en2*, *krox20*, *Hoxb9*). (C) Western blot detecting HA-tagged *Wise* protein secreted into the medium after RNA injection into oocytes. C, control uninjected oocytes. (D,E) Recombination of noggin-expressing and *Wise*-expressing animal caps assayed for induction of *Krox20* (D) or *en2* (E). In D, the *noggin* RNA injected cap was marked with FIDx (to the left of the broken line) and in E the *Wise* cap with *lacZ* (to the right of the broken line). *Wise* induces patches of *Krox20* or a ring of *en2* expression (arrowheads) in a non-cell-autonomous manner in the *noggin*-injected cap. (F,G) In situ hybridisation of chick embryo at stage 10. *Wise* is expressed in the surface ectoderm (se in G) from the level of presomitic mesoderm to the posterior. Expression is also seen faintly in the head surface ectoderm. (H) RNase protection of *Xenopus* embryos with stages noted above each lane. *Wise* is first detected at an early gastrula stage (st. 10) and the expression persists into tadpole stages. ODC is a loading control. (I-N) In situ hybridisation of *Xenopus* embryos at indicated stages. At the neurula stages (I-L), *Wise* is expressed in the surface ectoderm broadly at anteroposterior levels, strongest at the edge of the neural tube and the posterior edge of the eye (arrowheads in I,J). The expression is also seen in the stomodeal-hypophyseal anlage (arrow in J, front view; arrow in L, transverse section). At the tailbud stage (M,N) the expression appears to be localised in cranial placodes, lateral line placodes and the ventral neural tube at the diencephalon level (arrowhead in N).

oocytes (Fig. 1C) and COS cells (data not shown). We tested the ability of *Wise* to posteriorise neural tissue in a cell non-autonomous manner by using a tissue recombination assay in which a *Wise*-expressing animal cap was combined with a *noggin*-expressing animal cap. We found that both *en2* and *Krox20* were induced in discrete domains in the *noggin* caps (Fig. 1D,E). Hence, *Wise* has the ability to induce posterior markers at a distance.

### Wise expression

In situ hybridisation analyses revealed that *Wise* is highly expressed in the surface ectoderm of the embryo in a dynamic pattern. In chick, expression was first detectable broadly at stage 9, and then localised in the posterior surface ectoderm overlying the presomitic mesoderm by stage 10-11 (Fig. 1F,G). This expression resolved into a small posterior domain in the tail bud by stage 13 (data not shown). At later stages, *Wise* was expressed in other tissues such as branchial arches, limbs and feather buds (data not shown). By cloning the *Xenopus* homologue, we found that transcripts were first detected at the gastrula stage (Fig. 1H), and in comparison to chick more extensively along the AP axis in the surface ectoderm at the neurula stage (Fig. 1I). Other localised expression at neurula and tailbud stages was seen in the stomodeal-hypophyseal anlage (Fig. 1J-L), the ventral diencephalon (Fig. 1N) and presumably cranial and lateral line placodes (Fig. 1J,M,N). Some of the corresponding patterns were seen in chick embryos as well (data not shown).

### Functional analysis of *Wise* in *Xenopus* embryos

The function of *Wise* was first studied in *Xenopus* embryos using overexpression approaches. Injection of *Wise* RNA in

shown) as markers.

### Structural and functional properties of *Wise*

The predicted *Wise* protein consists of 206 amino acids and contains a cysteine knot-like domain found in a number of growth factors, as well as in Slit, mucin and CCN (Cef10/Cyr61, CTGF and Nov) family members (Bork, 1993) (Fig. 2A). Among these, the C-terminal domain of the CCN family members showed the highest homology to *Wise*, but other motifs conserved within the CCN family were absent in *Wise* (Fig. 2B). Hence, *Wise* is related to but not a member of the CCN family. A homology search revealed that *Wise* showed the highest amino acid identity (38%) to Sclerostin (SOST), identified by positional cloning of the gene mutated in sclerosteosis (Brunkow et al., 2001). There are a number of EST sequences homologous to *Wise* in zebrafish, mouse and human databases (Fig. 2A), but none was found in the *Drosophila* or *C. elegans* genomes.

A signal sequence motif is present at the N terminus of *Wise*, and its secretion was confirmed by western blotting after expression of an HA-tagged version of the protein in *Xenopus*

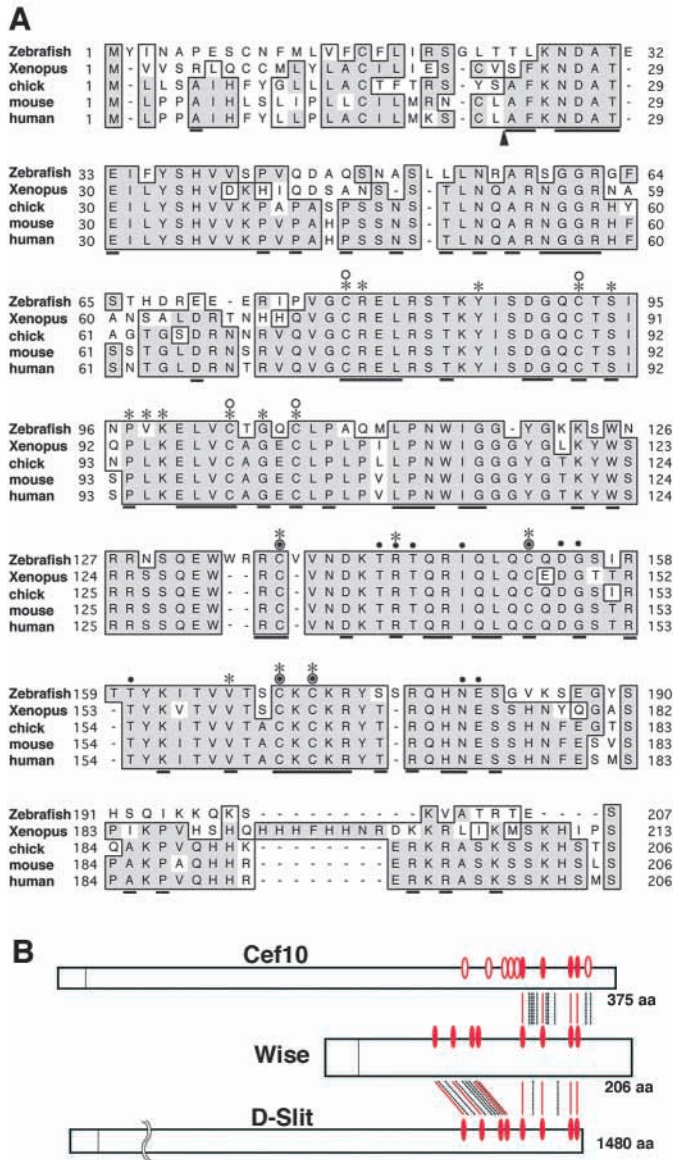

**Fig. 2.** Molecular structure of Wise. (A) Alignment of the predicted amino acid sequence of Zebrafish, *Xenopus*, chick, mouse and human Wise proteins. Shaded boxes represent identical amino acids between species; thick line underneath shows conserved amino acids in SOST, asterisks indicate residues conserved in *Drosophila* Slit and dots identify residues conserved in Cef10 (chick homologue of Cyr61 in CCN family). Circles mark conserved cysteine residues. The arrowhead delineates the site of signal peptide cleavage predicted in the chick protein. (B) Diagram showing alignment of conserved amino acids between Wise, Cef10 and *Drosophila* Slit. Red filled ovals and lines indicate cysteine residues conserved between Wise, Cef10 and Slit. Open ovals indicate additional cysteines in Cef10 conserved in the CT domain of CCN family members but not in Wise or Slit. Black dotted lines show other conserved amino acids.

amounts >200 pg into the whole embryo lead to gastrulation defects and loss of eyes (data not shown). At lower amounts (<100 pg), gastrulation proceeded normally, but neural tube closure was abnormal and the neural plate appeared thicker and shorter than controls (data not shown). To evaluate further the

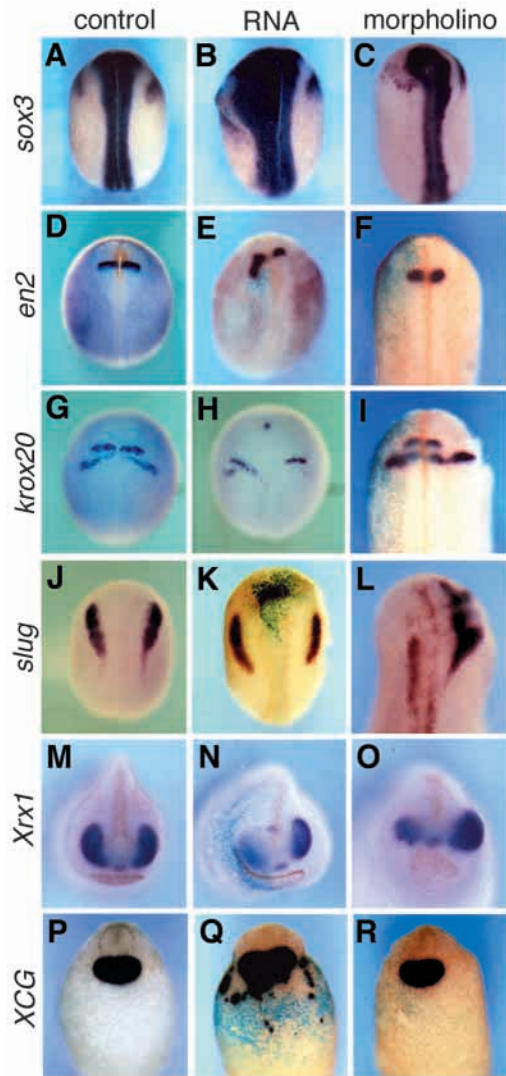

**Fig. 3.** Phenotypes after blastomere injection at four to eight cell stage of *Wise* RNA (B, E, H, K, N, Q) or antisense morpholino oligonucleotides (C, F, I, L, O, R) in comparison with control embryos (A, D, G, J, M, P) assayed by whole-mount in situ hybridisation at neurula stages. Marker is noted on the left of the panel. In most embryos, *lacZ* RNA was co-injected as a lineage tracer (blue staining). Injected side is to the left of each panel.

effects of *Wise* on development of the neural tube, RNA or DNA was injected into specific blastomeres at 4-16 cell stages. When *Wise* RNA injections were targeted to presumptive neural regions, lateral expansion of the neural plate on the injected side was observed (Fig. 3A, B). AP specific markers (*en2* and *Krox20*) were generally displaced laterally and posteriorly (Fig. 3D, E, G, H). When *Wise* injection was targeted to the forebrain region, ectopic expression of *Krox20* and *slug* was observed (Fig. 3H, K). This indicates that forebrain cells acquired a more posterior character in response to *Wise*. Other defects included a failure in eye and cement gland formation (Fig. 3M, N, and data not shown). Conversely, when *Wise* RNA was injected ventrally, ectopic cement glands were induced (Fig. 3P, Q). Identical results were obtained using DNA constructs for injection, where *Wise* expression commenced at mid-blastula

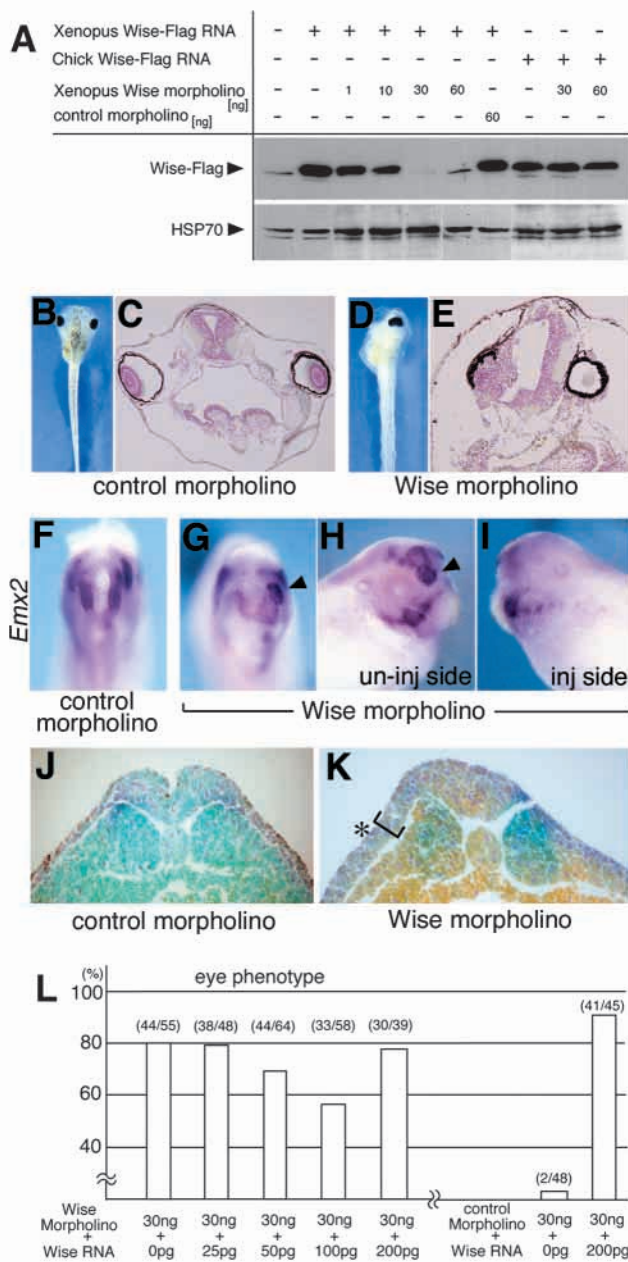

stages under the control of a cytoskeletal actin promoter (data not shown). Thus, ectopic expression of *Wise* altered aspects of AP patterning in embryos, as well as in animal caps.

To analyse the role of *Wise* in normal *Xenopus* development, we injected antisense morpholino oligonucleotides that specifically interfere with translation of *Wise* (Fig. 4A). By injection of morpholino oligonucleotides into both blastomeres at the two-cell stage, embryos became cyclopic (Fig. 4B-E). Localised injection of the morpholino into one of the dorsal animal blastomeres at four to eight cell stages resulted in a reduction of neural tissue (Fig. 3C), decreased amount of *slug*-positive neural crest cells (Fig. 3L), and the formation of a smaller eye (Fig. 3O) on the injected side. AP neural markers such as *en2* and *Krox20* and a cement gland marker *XCG* were not obviously affected (Fig. 3F,I,R). In the forebrain, *Wise* morpholino oligonucleotides caused loss of the olfactory

**Fig. 4.** Analysis with antisense morpholino oligonucleotides against *Wise*. (A) Antisense morpholino oligonucleotides against *Xenopus Wise* specifically blocks translation of *Xenopus Wise* RNA. Embryos were injected as indicated, animal caps were cut at stage 8, and the caps were collected at stage 9. Cell extracts were analysed by western blotting using anti-Flag and anti-HSP70 antibodies.

(B-E) Phenotypes arising from whole-embryo injection of control (B,C) or *Wise* antisense (D,E) morpholino oligonucleotides at stage 43. (B,D) Whole-mount dorsal view; (C,E) transverse sections at the eye level. (F-I) In situ hybridisation analysis of *Emx2* at stage 35 after injection of control (F) or *Wise* (G-I) morpholino oligonucleotides into a dorsal-animal blastomere at four- to eight-cell stages. (F,G) Dorsal view, anterior towards the top. (H,I) Lateral view. *Wise* morpholino oligonucleotides injection causes loss of olfactory placode. Arrowheads in G and H indicate unaffected placode on the uninjected side. (J,K) Injection of *Wise* antisense morpholino oligonucleotides causes thick surface ectoderm (\* in K) in comparison with the un-injected side or control embryo (J). (L) The eye defect caused by antisense morpholino oligos can be partially rescued by co-injection of chick *Wise* RNA.

placode revealed by *Emx2* staining (Fig. 4F-I). Histological sections at the trunk level of neurula stage embryos showed that *Wise* morpholino injection caused thicker surface ectoderm (Fig. 4J,K). These results indicated that *Wise* has endogenous roles in controlling eye, olfactory placode and surface ectoderm formation. The strong expression of *Wise* in cranial placodes at the tailbud stage (Fig. 1M,N) further suggests a key role for *Wise* in placode formation. *Wise* is likely to play a permissive role in the eye development, as the eye tissue shows only a small domain of expression at the tailbud stage (Fig. 1M), and depletion of *Wise* by morpholino injection affects only growth of the eye and not the initial formation of the eye primordium, as marked by *Xrx1* (Fig. 3O).

The fact that ectopic expression of *Wise* RNA and depletion of endogenous translation by the morpholino oligonucleotides both result in similar defects in eye formation (Fig. 3N,O; Fig. 4L) suggests that this process requires a precise level of signalling mediated by *Wise*. Defects in eye formation are also observed following injection of molecules that activate Wnt signalling (*Wnt8* DNA, *Frizzled3*) (Christian and Moon, 1993; Rasmussen et al., 2001) as well as molecules that inhibit the pathway (*Frzb1*, *Crescent*) (Pera and De Robertis, 2000). Other aspects of the phenotypes observed by altering *Wise* expression are also reminiscent of those seen when the Wnt signalling pathway is perturbed. For example, ectopic induction of cement gland is observed following injection of GSK3 $\beta$  (Itoh et al., 1995), and proper gastrulation and convergent extension movements require Wnt11 and Dishevelled (Heisenberg et al., 2000; Tada and Smith, 2000; Wallingford et al., 2000). Wnts/ $\beta$ -catenin function as posteriorising factors in animal cap assays (Domingos et al., 2001; McGrew et al., 1995), and also regulate induction of neural crest cells (Saint-Jeannet et al., 1997; LaBonne and Bronner-Fraser, 1998; Garcia-Castro et al., 2002). These similarities prompted us to test whether *Wise* acts through or modulates the Wnt signalling pathway.

#### **Wise activates the canonical Wnt pathway in animal caps**

As Wnts and *Wise* both induce *en2* expression in *noggin*-injected animal caps, we investigated whether the ability of *Wise* to induce *en2* requires Wnt signalling. To test this, *Wise*

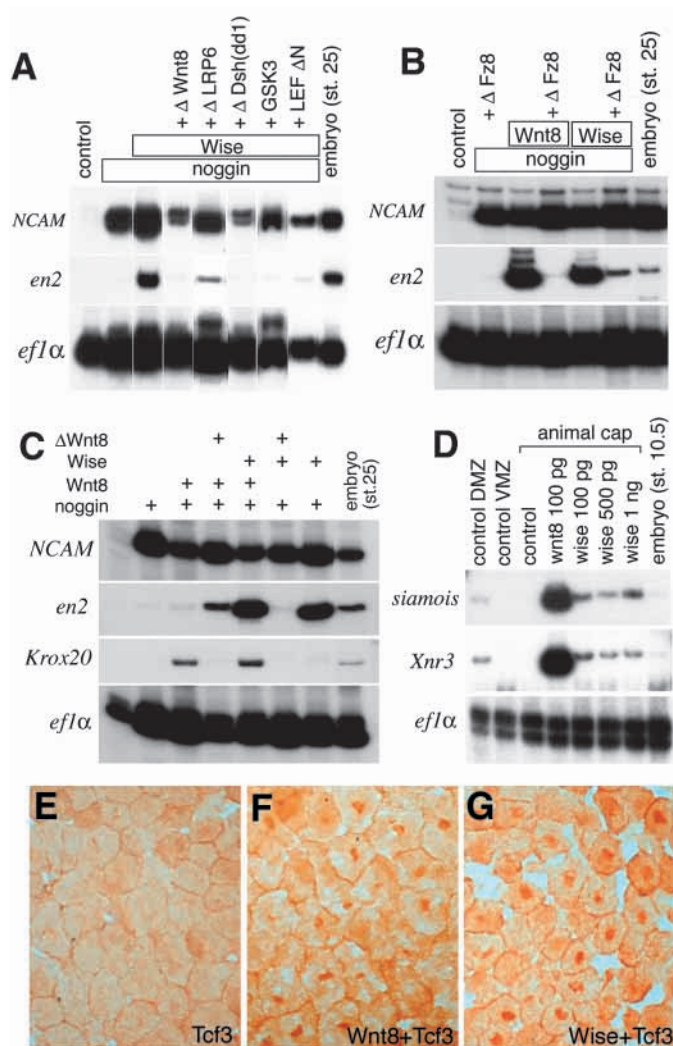

**Fig. 5.** Wise requires components of the Wnt pathway for *en2* induction and activates the canonical Wnt pathway. (A,B) RT-PCR of *noggin*-injected animal caps assayed for *en2* induction. Induction of *en2* is attenuated or blocked by dominant-negative (dn)-Wnt8 ( $\Delta$ Wnt8), dn-LRP6 ( $\Delta$ LRP6), dn-Dishevelled [ $\Delta$ Dsh (dd1)], GSK3- $\beta$  (GSK3), dn-Lef1 (LEF $\Delta$ N) (A) and dn-Frizzled8 ( $\Delta$ Fz8) (B). (C) Wise does not interfere with the ability of Wnt8 to induce *Krox20* in *noggin*-injected animal caps. *Wnt8*-induced *Krox20* expression is blocked by  $\Delta$ Wnt8, but not by Wise. (D) Long-exposure of RT-PCR result showing that *Wise*-injected animal caps express *siamois* and *Xnr3*, although very weakly in comparison with the induction by *Wnt8*. (E-G) Staining for subcellular localisation of endogenous  $\beta$ -catenin detected immunocytochemically in *Xenopus* animal caps after RNA injection of (E) Tcf3, (F) Wnt8+Tcf3 and (G) Wise+Tcf3. Both Wnt8 and Wise promote nuclear accumulation of  $\beta$ -catenin.

RNA was co-injected with blocking reagents of the Wnt pathway such as wild type GSK3 $\beta$  (Dominguez et al., 1995) and dominant-negative (dn) versions of Wnt8 (Hoppler et al., 1996), Frizzled8 (Itoh and Sokol, 1999), LRP6 (Tamai et al., 2000), Dishevelled (Sokol, 1996) or Lef1 (Vlaminckx et al., 1999). These reagents either eliminated or attenuated the ability of Wise to induce *en2* in neutralised animal caps (Fig. 5A,B). With respect to the intracellular component

Dishevelled, only dominant-negative constructs affecting the canonical Wnt pathway abolished *en2* induction (data not shown). Wnt8 and Wise showed an additive effect in induction of *en2* (Fig. 5C). To confirm the activation of the canonical Wnt pathway by Wise, we examined its effects in other assays. First, in animal cap explants in the absence of *noggin*, Wise showed a weak dorsalising activity by inducing *siamois* and *Xnr3*, two direct targets of the Wnt signalling pathway (Brannon et al., 1997) (Fig. 5D). Second, Injection of Wise RNA increased nuclear accumulation of  $\beta$ -catenin in animal caps, in a manner similar to that of Wnt8. This phenomenon was enhanced by co-injection of Tcf3, a co-factor of  $\beta$ -catenin for transcriptional activation (Fig. 5E-G). As animal caps were assayed before mid-blastula transition, we believe the observed effect is not due to secondarily induced transcription. These data suggest that Wise activates Wnt signalling and requires components of the canonical pathway to induce the signal in animal caps.

It is important to note that, although Wise and Wnts both activate the canonical pathway, there are distinct differences in their outputs. *Wnt8* RNA (50 pg) is sufficient to induce both *en2* and *Krox20* (Domingos et al., 2001), and a higher amount (600 pg) induces only *Krox20* (Fig. 5C). By comparison, it takes much higher amounts of *Wise* RNA (300-600 pg) just to induce *en2*, and 1.2 ng of Wise RNA is only sufficient to weakly induce *Krox20* (Fig. 1B). Similarly, Wnt8 robustly induces *siamois* and *Xnr3* at a low amount of RNA (100 pg), although Wise only induces these genes in a relatively weak manner, even at the highest levels of RNA (100-1000 pg) (Fig. 5D). These results show that Wise has weaker posteriorising and dorsalising activities in comparison with Wnt8, raising the possibility that there are both quantitative and qualitative differences in the outputs of the Wnt pathway when activated by these two proteins. The fact that Wnt8 induces dorsal mesoderm in animal caps in the presence of *noggin* (Domingos et al., 2001) although Wise does not (Fig. 1B), further supports their qualitative difference.

### Wise can interfere with Wnt signals

Although induction of *en2* can be explained by activation of Wnt signalling, the effects of injected *Wise* RNA on cement gland induction (Fig. 3Q) resemble those observed when the Wnt pathway is inhibited (Itoh et al., 1995). Thus, it is possible that in some contexts Wise blocks Wnt signalling. When *Wnt8* RNA is injected into a ventral vegetal blastomere at the four to eight cell stage, it induces an ectopic secondary axis (Smith and Harland, 1991; Sokol et al., 1991) (Fig. 6A). Based on the ability of Wise to induce *siamois* and *Xnr3*, we expected that Wise on its own might induce a secondary axis or work in synergy with Wnt8 in this process. However, injection of *Wise* RNA did not exhibit secondary axis formation (data not shown). Rather, co-injection of *Wise* RNA completely blocked Wnt8-induced secondary axis formation (Fig. 6B), as did a dominant negative form of Dishevelled (Fig. 6C). This inhibitory activity was confirmed at the molecular level in ventral marginal zone explants by demonstrating that the Wnt-dependent induction of *siamois* and *Xnr3* is greatly reduced by co-injection of *Wise* (Fig. 6D). These results suggest that in the presence of both Wnt8 and Wise, Wise interferes with the level of activity of Wnt8. *Wise* had no effect on the ability of injected intracellular components such as Dishevelled and  $\beta$ -catenin to

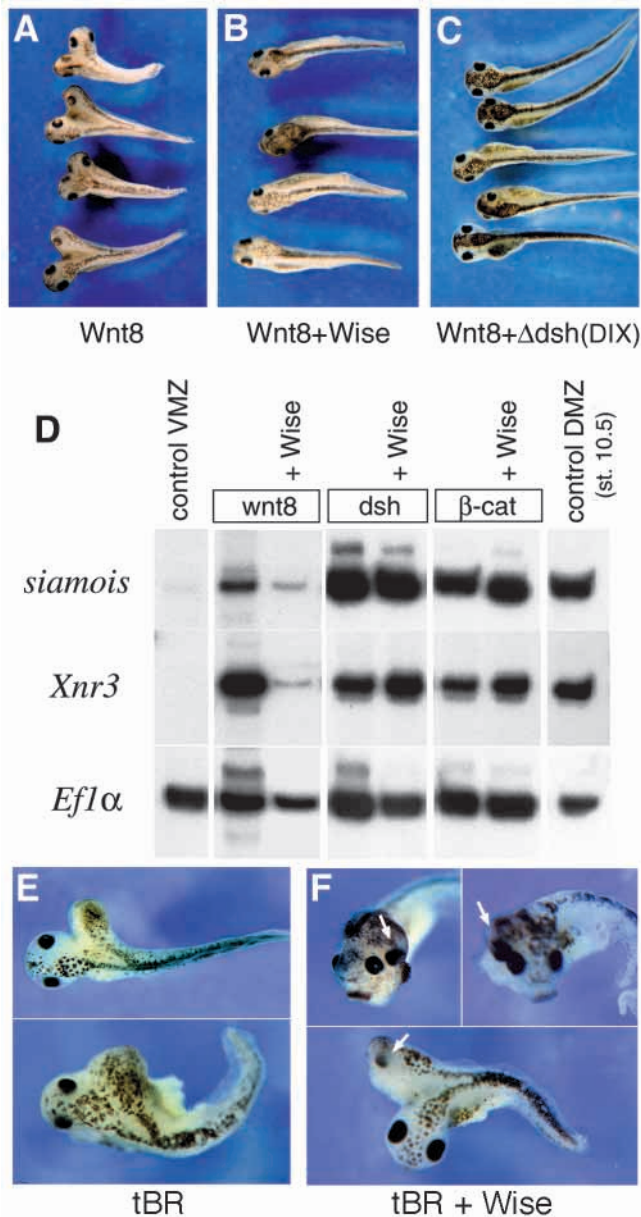

**Fig. 6.** *Wise* interferes with Wnt signalling. (A–C) *Wise* blocks secondary axes induced by Wnt8. Injection of *Wnt8* RNA into a ventral vegetal blastomere of four- to eight-cell stage embryos induces complete secondary axis formation (A). Co-injection of *Wise* blocks formation of Wnt8-induced secondary axes (B), as does co-injection of a dominant-negative dishevelled,  $\Delta$ Dsh (DIX) (C). (D) *Wise* functions extracellularly to block induction of *siamois* and *Xnr3* by the Wnt pathway in ventral marginal zone (VMZ) explants. *Wise* blocks the ability of Wnt8 to induce *siamois* and *Xnr3*, but does not interfere with the ability of dishevelled (*dsh*) or  $\beta$ -catenin ( $\beta$ -cat) to induce these markers. DMZ, dorsal marginal zone explant. (E,F) *Wise* acts as a Wnt inhibitor and complements a truncated BMP receptor (*tBR*) to induce head structures. When BMP signalling is blocked in the ventral marginal zone by injection of *tBR*, an incomplete secondary axis is formed (E). Co-injection of *tBR* and *Wise* induces a complete secondary axis with eyes (arrows) and cement gland (F).

### Wise might affect the planar cell polarity pathway of Wnt signalling

Although the activating and inhibiting properties of *Wise* in animal caps and embryos described above are dependent upon the canonical Wnt pathway, it is possible that *Wise* also influences the planar cell polarity (PCP) pathway that branches at Dishevelled. Wnt11 is required for proper convergent extension movements of mesoderm during gastrulation in *Xenopus* and Zebrafish, and this has been shown to be dependent upon the PCP pathway of Wnt signalling (Heisenberg et al., 2000; Tada and Smith, 2000; Wallingford et al., 2000). Animal caps cultured in the presence of activin form mesoderm, and undergo convergent extension movements that can be blocked by reagents that either elevate or decrease Wnt signalling (Tada and Smith, 2000). This implies that precise levels of Wnt signalling through the PCP pathway are essential for coordinated cell movements.

In this animal cap assay, injection of *Wise* RNA blocked cell movements preventing elongation of animal caps, but had no effect on activin-induced mesoderm formation (Fig. 7). This suggests that *Wise* might influence the Wnt-dependent PCP pathway, but whether this is mediated by its ability to activate or inhibit the pathway cannot be distinguished. This effect on cell behaviour in animal caps is consistent with and may explain the phenotypic effects observed in *Wise*-injected whole embryos. *Wise* perturbed the morphogenesis of the neural tube, which failed to close. It was thickened and shortened, and there was a lateral expansion, broadening or posterior-shift of AP markers. Many of these defects appear to relate to abnormal convergent extension movements during gastrulation. However, the fact that morpholino antisense oligonucleotides do not interfere with gastrulation (Fig. 4D) and neural AP patterns (Fig. 3F,I), and that *Wise* is not predominantly expressed at gastrula stage (Fig. 1H), both suggest that endogenous *Wise* is unlikely to be involved in normal gastrulation movements. This assay suggests that *Wise* has a potential to interfere with Wnt-mediated PCP as well as the canonical pathway.

### Wise interacts with Wnt co-receptor LRP6

*Wise* encodes a secreted protein and interacts with the Wnt pathway extracellularly (Fig. 5A,B; Fig. 6D). Therefore, to begin to approach the mechanisms of action, we investigated

induce *Xnr3* and *siamois* (Fig. 6D), suggesting that *Wise* functions extracellularly to interfere with the canonical Wnt pathway. The inhibitory effect of *Wise* on Wnt signalling was further examined by assaying secondary head induction, which can be induced by simultaneous inhibition of both BMP and Wnt signalling (Glinka et al., 1997) (Fig. 6E). Co-injection of *Wise* and a dominant-negative BMP receptor (Suzuki et al., 1994) induced a complete secondary axis with eyes and cement gland (Fig. 6F), demonstrating that *Wise* functions as a Wnt inhibitor in this context. This contrasts with our analysis in animal caps, which reveals that *Wise* does not interfere with the action of Wnt in the induction of *Krox20* (Fig. 5C). Therefore, modulation of the Wnt pathway by *Wise* (activation or inhibition) varies with respect to both target genes and cellular contexts.

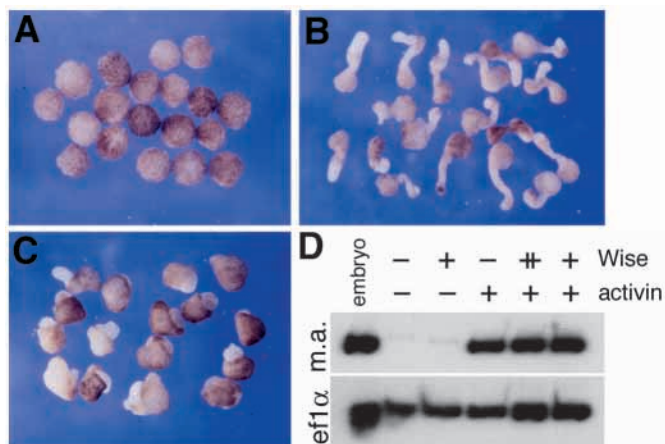

potential physical interactions of Wise with Wnt family members or their putative co-receptors Frizzled8 (Hsieh et al., 1999) and LRP6 (Tamai et al., 2000) (Fig. 8). We mixed conditioned medium of 293 or S2 cells containing a secreted form of LRP6 (Tamai et al., 2000) or Frizzled8 (Hsieh et al., 1999) with Wise conditioned medium, and assayed for interactions by immunoprecipitation (IP). In this assay, Wise bound to LRP6 but not to Frizzled8 (Fig. 8A) or Wnt8 (Fig. 8B). Recent studies have shown that individual members of the Dickkopf (Dkk) family of secreted proteins can either antagonise or stimulate Wnt signalling through interaction with

**Fig. 7.** Wise blocks cell movements in activin-treated animal caps. (A) Control animal caps at stage 15. (B) Control animal caps treated with activin (8 units/ml). They undergo gastrulation-like movements in response to activin and become elongated. (C) Animal caps from *Wise* RNA (1 ng) injected embryos, treated with activin. Elongation is blocked. (D) RT-PCR of animal caps assayed for muscle-actin (m.a.) and *eflα*. All caps were assayed at stage 15. Induction of muscle actin by activin is not interfered by preceded injection of 500 pg (+) or 1 ng (++) of *Wise* RNA, showing that failure in elongation in response to activin in C is not due to failure in muscle induction.

LRP6 (Brott and Sokol, 2002; Mao et al., 2001; Wu et al., 2000). Therefore we performed IP experiments to determine if *Wise* shares common binding sites with Dkk1 or Wnt on LRP6. The extracellular domain of LRP6 contains four EGF repeats and Dkk1 interacts with repeats 3-4, while Wnt interactions seem to involve mainly repeats 1-2 (Mao et al., 2001). We found that *Wise* binds to LRP6 and a variant where EGF repeats 3 and 4 are deleted ( $\Delta$ E3-4), but not to one in which EGF repeats 1 and 2 are removed ( $\Delta$ E1-2) (Fig. 8A). Conversely, Dkk1 binds to LRP6 and  $\Delta$ E1-2, but not to  $\Delta$ E3-4 (Fig. 8A). These results show that *Wise* shares the domain on LRP6 essential for interaction with Wnts and that *Wise* and Dkk1 modulate LRP6 activity by interacting through different domains. We also tested whether *Wise* and Wnt8 can bind to LRP6 at the same time or whether they compete for binding. As shown in Fig. 8C, *Wise* interferes with the binding of Wnt8 to LRP6. This suggests a mechanism whereby *Wise* inhibits Wnt signalling by competing with Wnt8 for binding to LRP6 (Fig. 8D).

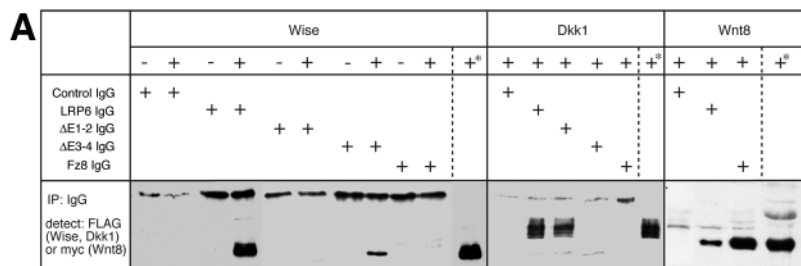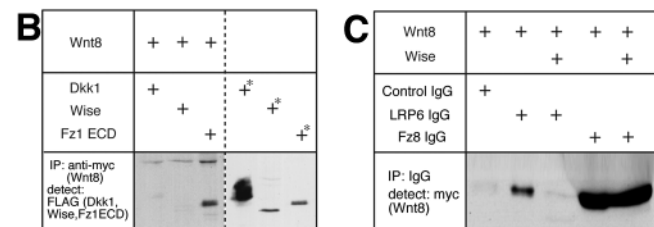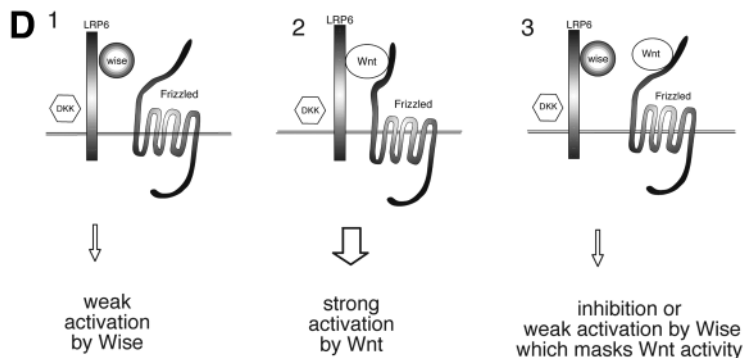

## DISCUSSION

In this study, we have identified and characterised a novel secreted protein, *Wise*, that modulates the

**Fig. 8.** *Wise* interacts with the extracellular domain of LRP6. (A-C) All components were provided as concentrated conditioned medium for the immunoprecipitation study. Asterisks show samples of input loaded directly on to the gel. Extracellular domains of LRP6 and Frizzled8 are fused to human IgG Fc domain.  $\Delta$ E1-2 and  $\Delta$ E3-4 are deletion constructs of LRP6 in which the first two or last two EGF repeats respectively are missing (Mao et al., 2001). (A) *Wise* binds to LRP6 and a deletion construct of LRP6 ( $\Delta$ E3-4), but not to Frizzled8 or LRP6  $\Delta$ E1-2. Dkk1 binds to LRP6 and  $\Delta$ E1-2 LRP6, but not to  $\Delta$ E3-4 LRP6 or Frizzled8. Wnt8 binds to LRP6 and Frizzled8. (B) *Wise* does not bind to Wnt8. Dkk1 and extracellular domain of Frizzled1 (Fz1 ECD) are used as a negative and a positive control for binding to Wnt8, respectively. (C) Binding of Wnt8 and LRP6 is attenuated in the presence of *Wise*, but binding of Wnt8 and Frizzled8 is not. (D) A possible model of *Wise* action on Wnt signalling. Open arrows in each panel show weak (1,3) and strong (2) activation of the downstream pathway. (1,2) *Wise* and Wnt share the same binding domain of LRP6, while Dkk1 interacts with a different domain on LRP6. *Wise* induction of downstream targets of the canonical Wnt pathway is weaker compared with Wnt. (3) *Wise* competes with Wnt for binding to LRP6, resulting in attenuation of the Wnt action (compare 2 with 3).



Wnt signalling pathway. *Wise* is conserved in vertebrates and contains a cysteine knot-like domain, present in members of the CCN family and other growth factors. *Wise* is expressed in the surface ectoderm, in which Wnt signalling plays multiple roles. The ability of *Wise* to affect gastrulation, neural tube morphogenesis and AP patterning in *Xenopus* explant and embryonic assays are consistent with its functioning to alter Wnt signalling. The novel aspect of *Wise* compared with other extracellular Wnt modulators is that it both activates and inhibits Wnt signalling in different contexts. In some contexts, *Wise* stimulates the canonical Wnt pathway, whereby it acts through Dishevelled and  $\beta$ -catenin. The ability of *Wise* to interact physically with LRP6 by sharing the same binding domain with Wnt8 suggests that it might function as an alternative ligand for the receptor. In other contexts, *Wise* antagonises Wnt signalling through the canonical pathways presumably by blocking accessibility of certain Wnts to their receptors. The ability of *Wise* to both activate and inhibit Wnt signalling provides a new mechanism for modulating Wnt signalling and adds a new level of complexity to how the array of ligands and inhibitors are integrated to control the balance of Wnt signalling in different developmental contexts.

### Role for *Wise* in surface ectoderm

The ability of *Wise* to interact with the Wnt pathway and the fact that it is normally expressed in a transient manner in the non-neural surface ectoderm, suggest that it might have a role in modulating Wnt signalling in this tissue. Morpholino antisense oligonucleotide against *Wise* caused thick surface ectoderm (Fig. 4K), and overexpression of *Wise* by RNA injection caused expanded neural plate (Fig. 3B). These results suggest that endogenous expression of *Wise* at the edge of the neural plate might regulate the balance of neural and non-neural ectoderm transition. It is known that a balance between Wnt and BMP signalling in the surface ectoderm and dorsal neural tube is important in modulating dorsal fates and the generation of neural crest cells (Dickinson et al., 1995; Garcia-Castro et al., 2002; Liem et al., 1995; Trainor and Krumlauf, 2002). Furthermore, Wnts in the surface ectoderm influence patterning of the underlying somites and their derivatives (Capdevila et al., 1998; Munsterberg et al., 1995). The distribution and timing of *Wise* expression in the surface ectoderm together with the result of morpholino experiments suggest that it promotes precise levels of Wnt signalling to control some of these interactions.

### Wise, Wnts and patterning

*Wise* was isolated on the basis of its ability to alter AP neural patterning, an activity consistent with its interaction with the Wnt cascade. Recent studies provide us with evidence on involvement of Wnt pathway in AP patterning (Davidson et al., 2002; Domingos et al., 2001; Kiecker and Niehrs, 2001). Furthermore, an increasing number of extracellular and intracellular inhibitors of Wnt signalling have been found, highlighting the considerable complexity in the nature of regulating this cascade. The roles for *Wise* in Wnt signalling raises the possibility that other members of this class of cysteine-knot proteins may also exert some of their functions by modulating Wnt activity. Indeed, the CCN family member Cyr61 is also capable of regulating Wnt signalling, although its mode of action is unknown (Latinkic et al., 2003). *Wise* is

distinguished from other Wnt modulators as it seems to have multiple roles in modulating and integrating the readout of Wnt signalling depending upon the local context.

Even though *Wise* requires the canonical Wnt pathway to posteriorise noggin-treated animal caps, there are differences in the patterns of induction compared with stimulation by Wnt ligands such as Wnt8. *Wise* induces *en2* at low levels of injected RNA, and *en2* plus *Krox20* only at high levels (Fig. 1B). By contrast, *en2* and *Krox20* are simultaneously induced by Wnt8, even with very low amounts of RNA, and Wnt8 can induce more posterior Hox genes such as *Hoxb9* (Domingos et al., 2001). Another difference is that although Wnts or  $\beta$ -catenin downregulate forebrain markers (*Otx2*, *BFI*) at the same time as inducing posterior genes (McGrew et al., 1997; McGrew et al., 1995) *Wise* does not (Fig. 1B). The basis of these differences is not clear. It has been suggested that *en2* is under the direct regulation of Tcf3 (McGrew et al., 1999), which seems to reflect processes in the isthmus region, where Wnt1 is required for expression of *en2* (Danielian and McMahon, 1996; McMahon et al., 1992). However, the activation of other downstream targets, such as *Krox20* and *Hoxb9*, could be indirect and involve multiple steps downstream of the direct action of  $\beta$ -catenin and Lef/Tcf. For example, *Wise* does not induce mesoderm in the presence or absence of *noggin*, whereas Wnts or  $\beta$ -catenin do (Sokol, 1993). As mesoderm can influence AP patterning, the differences associated with induction by Wnt might in part be mediated indirectly through mesoderm. Hence, even though *Wise* and Wnts stimulate the same pathway, there are differences in the nature of their outputs and *Wise* appears to be a much weaker inducer of posterior genes.

### Dual roles for *Wise*: a context dependent agonist and antagonist

Recent studies on secreted proteins that affect Wnt signalling suggest complex mechanisms modulating the canonical Wnt pathway. Different Frizzled-related protein and Dkk family members exhibit opposite effects in a variety of in vivo and in vitro assays (Bradley et al., 2000; Brott and Sokol, 2002; Li et al., 2002; Mao and Niehrs, 2003; Wu et al., 2000). The activation of the Wnt pathway by *Wise* is either weaker or different than that seen using Wnts because it takes higher concentrations of *Wise* to induce *en2* and *Krox20* and the relative levels of induction of *siamois* and *Xnr3* are much lower. With respect to inhibition, in the presence of both Wnt and *Wise*, *Wise* competes with Wnts for the binding to LRP6. This could result in either a less efficient activation of the receptors, which masks Wnt dependent activity, or a complete block of receptor activity (Fig. 8D). It is also possible that *Wise* could affect Wnt signalling through additional mechanisms. The interaction of *Wise* with LRP6 may also interfere with the function of Dkks, which could result in either activation or inhibition of the Wnt pathway depending upon which Dkk family member is present. There remains the possibility that *Wise* interacts with other receptors or modulators that work through intracellular Wnt signalling components. We observed that *Wise* interferes with cell movements in activin-treated animal caps (Fig. 7), consistent with the gastrulation defects observed in *Wise*-injected whole embryos. As the pathway involved in cell movements does not appear to require LRP6 (Semenov et al., 2001), this result implies that *Wise* could

interact with other proteins for its function. The studies presented here reveal new mechanisms through which a fine balance in Wnt signalling is regulated in various developmental processes.

We thank the following people for probes and constructs: R. M. Harland (noggin), M. Tada (modified p64T), C. Tabin (Fz1), R.T. Moon (Wnt8, dnWnt8, Wnt8-myc), S.Y. Sokol (dsh, dd1, Fz8, Fz8ECD, GSK3 $\beta$ ), N. Papalopulu (Sox3), E. Boncinelli (Emx1,2), G Barsacchi (Xrx1), A. Hecht (LefAN), J.-C. Hsieh (Fz8-IgG, Wnt8-myc), X. He (LRP6 IgG), C. Niehrs (Dkk1-FLAG, LRP6  $\Delta$ E1-2,  $\Delta$ E3-4) and T.J. Mohun (*Xenopus* cDNA library). We specifically thank M. Tada, J.-C. Hsieh, C. Niehrs, X. He and R. M. Harland for technical suggestion and discussion. N.I. was supported by HFSP, and PMD by Gulbenkian Foundation. This work was funded by Core MRC Programme support to R.K. and J.C.S. and an EEC Biotechnology Network grant (#BIO4 CT-960378) to R.K. GenBank Accession Numbers: chick *Wise*, AY319926; *Xenopus Wise*, AY319927, AY319928.

## REFERENCES

- Axelrod, J. D., Miller, J. R., Shulman, J. M., Moon, R. T. and Perrimon, N. (1998). Differential recruitment of Dishevelled provides signaling specificity in the planar cell polarity and Wingless signaling pathways. *Genes Dev.* **12**, 2610-2622.
- Baker, J. C., Beddington, R. S. and Harland, R. M. (1999). Wnt signaling in *Xenopus* embryos inhibits bmp4 expression and activates neural development. *Genes Dev.* **13**, 3149-3159.
- Blumberg, B., Bolado, J., Moreno, T., Kintner, C., Evans, R. and Papalopulu, N. (1997). An essential role for retinoid signaling in anteroposterior neural patterning. *Development* **124**, 373-379.
- Bork, P. (1993). The modular architecture of a new family of growth regulators related to connective tissue growth factor. *FEBS Lett.* **327**, 125-130.
- Bradley, L., Sun, B., Collins-Racie, L., LaVallie, E., McCoy, J. and Sive, H. (2000). Different activities of the frizzled-related proteins frzb2 and sizzled2 during *Xenopus* anteroposterior patterning. *Dev. Biol.* **227**, 118-132.
- Brannon, M., Gomperts, M., Sumoy, L., Moon, R. T. and Kimelman, D. (1997). A  $\beta$ -catenin/XTcf-3 complex binds to the siamois promoter to regulate dorsal axis specification in *Xenopus*. *Genes Dev.* **11**, 2359-2370.
- Brott, B. K. and Sokol, S. Y. (2002). Regulation of Wnt/LRP signaling by distinct domains of Dickkopf proteins. *Mol. Cell. Biol.* **22**, 6100-6110.
- Brunkow, M. E., Gardner, J. C., van Ness, J., Paepfer, B. W., Kovacevich, B. R., Proll, S., Skonier, J. E., Zhao, L., Sabo, P. J., Fu, Y. et al. (2001). Bone dysplasia sclerosteosis results from loss of the SOST gene product, a novel cysteine knot-containing protein. *Am. J. Hum. Genet.* **68**, 577-589.
- Capdevila, J., Tabin, C. and Johnson, R. L. (1998). Control of dorsoventral somite patterning by Wnt-1 and beta-catenin. *Dev. Biol.* **193**, 182-194.
- Christian, J. L. and Moon, R. T. (1993). Interactions between Xwnt-8 and Spemann organizer signaling pathways generate dorsoventral pattern in the embryonic mesoderm of *Xenopus*. *Genes Dev.* **7**, 13-28.
- Cox, W. G. and Hemmati-Brivanlou, A. (1995). Caudalization of neural fate by tissue recombination and bFGF. *Development* **121**, 4349-4358.
- Danielian, P. S. and McMahon, A. P. (1996). Engrailed-1 as a target of the Wnt-1 signalling pathway in vertebrate midbrain development. *Nature* **383**, 332-334.
- Davidson, G., Mao, B., del Barco Barrantes, I. and Niehrs, C. (2002). Kremen proteins interact with Dickkopf1 to regulate anteroposterior CNS patterning. *Development* **129**, 5587-5596.
- Dickinson, M. E., Selleck, M. A., McMahon, A. P. and Bronner-Fraser, M. (1995). Dorsalization of the neural tube by the non-neural ectoderm. *Development* **121**, 2099-2106.
- Domingos, P. M., Itasaki, N., Jones, C. M., Mercurio, S., Sargent, M. G., Smith, J. C. and Krumlauf, R. (2001). The Wnt/beta-catenin pathway posteriorizes neural tissue in *Xenopus* by an indirect mechanism requiring FGF signalling. *Dev. Biol.* **239**, 148-160.
- Dominguez, I., Itoh, K. and Sokol, S. Y. (1995). Role of glycogen synthase kinase 3 beta as a negative regulator of dorsoventral axis formation in *Xenopus* embryos. *Proc. Natl. Acad. Sci. USA* **92**, 8498-8502.
- Doniach, T. (1993). Planar and vertical induction of anteroposterior pattern during the development of the amphibian central nervous system. *J. Neurobiol.* **24**, 1256-1275.
- Garcia-Castro, M. I., Marcelle, C. and Bronner-Fraser, M. (2002). Ectodermal Wnt function as a neural crest inducer. *Science* **297**, 848-851.
- Glinka, A., Wu, W., Onichtchouk, D., Blumenstock, C. and Niehrs, C. (1997). Head induction by simultaneous repression of Bmp and Wnt signalling in *Xenopus*. *Nature* **389**, 517-519.
- Gould, A., Itasaki, N. and Krumlauf, R. (1998). Initiation of rhombomeric Hoxb4 expression requires induction by somites and a retinoid pathway. *Neuron* **21**, 39-51.
- Grapin-Botton, A., Bonnin, M.-A. and Le Douarin, N. M. (1997). *Hox* gene induction in the neural tube depends on three parameters: competence, signal supply and paralogue group. *Development* **124**, 849-859.
- Hamburger, V. and Hamilton, H. L. (1951). A series of normal stages in the development of the chick embryo. *J. Morphol.* **88**, 49-92.
- Heisenberg, C. P., Tada, M., Rauch, G. J., Saude, L., Concha, M. L., Geisler, R., Stemple, D. L., Smith, J. C. and Wilson, S. W. (2000). Silberblick/Wnt11 mediates convergent extension movements during zebrafish gastrulation. *Nature* **405**, 76-81.
- Hemmati-Brivanlou, A. and Melton, D. (1997). Vertebrate embryonic cells will become nerve cells unless told otherwise. *Cell* **88**, 13-17.
- Hemmati-Brivanlou, A. and Melton, D. A. (1994). Inhibition of activin receptor signaling promotes neuralization in *Xenopus*. *Cell* **77**, 273-281.
- Hoppler, S., Brown, J. D. and Moon, R. T. (1996). Expression of a dominant-negative Wnt blocks induction of MyoD in *Xenopus* embryos. *Genes Dev.* **10**, 2805-2817.
- Hsieh, J. C., Rattner, A., Smallwood, P. M. and Nathans, J. (1999). Biochemical characterization of Wnt-frizzled interactions using a soluble, biologically active vertebrate Wnt protein. *Proc. Natl. Acad. Sci. USA* **96**, 3546-3551.
- Itasaki, N., Sharpe, J., Morrison, A. and Krumlauf, R. (1996). Reprogramming *Hox* expression in the vertebrate hindbrain: Influence of paraxial mesoderm and rhombomere transposition. *Neuron* **16**, 487-500.
- Itoh, K. and Sokol, S. (1997). Graded amounts of *Xenopus* dishevelled specify discrete anteroposterior cell fates in prospective ectoderm. *Mech. Dev.* **61**, 113-125.
- Itoh, K. and Sokol, S. Y. (1999). Axis determination by inhibition of Wnt signaling in *Xenopus*. *Genes Dev.* **13**, 2328-2336.
- Itoh, K., Tang, T. L., Neel, B. G. and Sokol, S. Y. (1995). Specific modulation of ectodermal cell fates in *Xenopus* embryos by glycogen synthase kinase. *Development* **121**, 3979-3988.
- Jones, C. M. and Smith, J. C. (1999). An overview of *Xenopus* development. *Methods Mol. Biol.* **97**, 331-340.
- Kiecker, C. and Niehrs, C. (2001). A morphogen gradient of Wnt/beta-catenin signalling regulates anteroposterior neural patterning in *Xenopus*. *Development* **128**, 4189-4201.
- Kolm, P., Apekin, V. and Sive, H. (1997). *Xenopus* hindbrain patterning requires retinoid signaling. *Dev. Biol.* **192**, 1-16.
- LaBonne, C. and Bronner-Fraser, M. (1998). Neural crest induction in *Xenopus*: evidence for a two-signal model. *Development* **125**, 2403-2414.
- Lamb, T. M. and Harland, R. M. (1995). Fibroblast growth factor is a direct neural inducer, which combined with noggin generates anterior-posterior neural pattern. *Development* **121**, 3627-3636.
- Latinkic, B. V., Mercurio, S., Bennett, B., Hirst, E. M., Xu, Q., Lau, L. F., Mohun, T. J. and Smith, J. C. (2003). *Xenopus* Cyr61 regulates gastrulation movements and modulates Wnt signalling. *Development* **130**, 2429-2441.
- Li, L., Mao, J., Sun, L., Liu, W. and Wu, D. (2002). Second cysteine-rich domain of Dickkopf-2 activates canonical Wnt signaling pathway via LRP-6 independently of dishevelled. *J. Biol. Chem.* **277**, 5977-5981.
- Liem, K. F., Jr, Tremml, G., Roelink, H. and Jessell, T. M. (1995). Dorsal differentiation of neural plate cells induced by BMP-mediated signals from epidermal ectoderm. *Cell* **82**, 969-979.
- Mao, B. and Niehrs, C. (2003). Kremen2 modulates Dickkopf2 activity during Wnt/IRP6 signaling. *Gene* **302**, 179-183.
- Mao, B., Wu, W., Li, Y., Hoppe, D., Stanek, P., Glinka, A. and Niehrs, C. (2001). LDL-receptor-related protein 6 is a receptor for Dickkopf proteins. *Nature* **411**, 321-325.
- McGrew, L., Lai, C.-J. and Moon, R. (1995). Specification of the anteroposterior neural axis through synergistic interaction of the Wnt signalling cascade with *noggin* and *folliculin*. *Dev. Biol.* **172**, 337-342.
- McGrew, L., Hoppler, S. and Moon, R. (1997). Wnt and FGF pathways cooperatively pattern anteroposterior neural ectoderm in *Xenopus*. *Mech. Dev.* **69**, 105-114.

- McGrew, L., Takemaru, K., Bates, R. and Moon, R.** (1999). Direct regulation of the *Xenopus* engrailed-2 promoter by the Wnt signaling pathway, and a molecular screen for Wnt-responsive genes, confirm a role for Wnt signaling during neural patterning in *Xenopus*. *Mech. Dev.* **87**, 21-32.
- McMahon, A. P., Joyner, A. L., Bradley, A. and McMahon, J. A.** (1992). The midbrain-hindbrain phenotype of Wnt-1/Wnt-1- mice results from stepwise deletion of engrailed-expressing cells by 9.5 days postcoitum. *Cell* **69**, 581-595.
- Muhr, J., Jessell, T. and Edlund, T.** (1997). Assignment of early caudal identity to neural plate cells by a signal from caudal paraxial mesoderm. *Neuron* **19**, 487-502.
- Munsterberg, A. E., Kitajewski, J., Bumcrot, D. A., McMahon, A. P. and Lassar, A. B.** (1995). Combinatorial signaling by Sonic hedgehog and Wnt family members induces myogenic bHLH gene expression in the somite. *Genes Dev.* **9**, 2911-2922.
- Pera, E. M. and de Robertis, E. M.** (2000). A direct screen for secreted proteins in *Xenopus* embryos identifies distinct activities for the Wnt antagonists Crescent and Frzb-1. *Mech. Dev.* **96**, 183-195.
- Pownall, M. E., Tucker, A. S., Slack, J. M. and Isaacs, H. V.** (1996). eFGF, Xcad3 and Hox genes form a molecular pathway that establishes the anteroposterior axis in *Xenopus*. *Development* **122**, 3881-3892.
- Rasmussen, J. T., Deardorff, M. A., Tan, C., Rao, M. S., Klein, P. S. and Vetter, M. L.** (2001). Regulation of eye development by frizzled signaling in *Xenopus*. *Proc. Natl Acad. Sci. USA* **98**, 3861-3866.
- Saint-Jeannet, J. P., He, X., Varmus, H. E. and Dawid, I. B.** (1997). Regulation of dorsal fate in the neuraxis by Wnt-1 and Wnt-3a. *Proc. Natl. Acad. Sci. USA* **94**, 13713-13718.
- Semenov, M. V., Tamai, K., Brott, B. K., Kuhl, M., Sokol, S. and He, X.** (2001). Head inducer Dickkopf-1 is a ligand for Wnt coreceptor LRP6. *Curr. Biol.* **11**, 951-961.
- Smith, W. C. and Harland, R. M.** (1991). Injected Xwnt-8 RNA acts early in *Xenopus* embryos to promote formation of a vegetal dorsalizing center. *Cell* **67**, 753-765.
- Smith, W. C. and Harland, R. M.** (1992). Expression cloning of noggin, a new dorsalizing factor localised to the Spemann organiser in *Xenopus* embryos. *Cell* **70**, 828-840.
- Sokol, S., Christian, J. L., Moon, R. T. and Melton, D. A.** (1991). Injected wnt RNA induces a complete body axis in *Xenopus* embryos. *Cell* **67**, 741-752.
- Sokol, S. Y.** (1993). Mesoderm formation in *Xenopus* ectodermal explants overexpressing Xwnt8: evidence for a cooperating signal reaching the animal pole by gastrulation. *Development* **118**, 1335-1342.
- Sokol, S. Y.** (1996). Analysis of Dishevelled signalling pathways during *Xenopus* development. *Curr. Biol.* **6**, 1456-1467.
- Suzuki, A., Thies, R. S., Yamaji, N., Song, J. J., Wozney, J. M., Murakami, K. and Ueno, N.** (1994). A truncated bone morphogenetic protein receptor affects dorsal-ventral patterning in the early *Xenopus* embryo. *Proc. Natl. Acad. Sci. USA* **91**, 10255.
- Tada, M., Casey, E. S., Fairclough, L. and Smith, J. C.** (1998). Bix1, a direct target of *Xenopus* T-box genes, causes formation of ventral mesoderm and endoderm. *Development* **125**, 3997-4006.
- Tada, M. and Smith, J. C.** (2000). Xwnt11 is a target of *Xenopus* Brachyury: regulation of gastrulation movements via Dishevelled, but not through the canonical Wnt pathway. *Development* **127**, 2227-2238.
- Tamai, K., Semenov, M., Kato, Y., Spokony, R., Liu, C., Katsuyama, Y., Hess, F., Saint-Jeannet, J.-P. and He, X.** (2000). LDL-receptor-related proteins in Wnt signal transduction. *Nature* **407**, 530-535.
- Trainor, P. and Krumlauf, R.** (2000). Plasticity in mouse neural crest cells reveals a new patterning role for cranial mesoderm. *Nat. Cell Biol.* **2**, 96-102.
- Trainor, P. and Krumlauf, R.** (2002). Riding the crest of the Wnt signaling wave. *Science* **297**, 781-783.
- Vleminckx, K., Kemler, R. and Hecht, A.** (1999). The C-terminal transactivation domain of beta-catenin is necessary and sufficient for signaling by the LEF-1/beta-catenin complex in *Xenopus laevis*. *Mech. Dev.* **81**, 65-74.
- Wallace, R. A., Jared, D. W., Dumont, J. N. and Sega, M. W.** (1973). Protein incorporation by isolated amphibian oocytes. 3. Optimum incubation conditions. *J. Exp. Zool.* **184**, 321-333.
- Wallingford, J. B., Rowning, B. A., Vogeli, K. M., Rothbacher, U., Fraser, S. E. and Harland, R. M.** (2000). Dishevelled controls cell polarity during *Xenopus* gastrulation. *Nature* **405**, 81-85.
- Woo, K. and Fraser, S.** (1997). Specification of the zebrafish nervous system by non-axial signals. *Science* **277**, 254-257.
- Wu, W., Glinka, A., Delius, H. and Niehrs, C.** (2000). Mutual antagonism between dickkopf1 and dickkopf2 regulates Wnt/beta-catenin signalling. *Curr. Biol.* **10**, 1611-1614.
